# Supplementary material for: Temporal patterns of physical activity and sedentary behavior in 10–14 year-old children on weekdays
Source: PubMed Central journal article supplement (PMC4545696; doi:10.1186/s12889-015-2093-7), 2015-08-19

**A**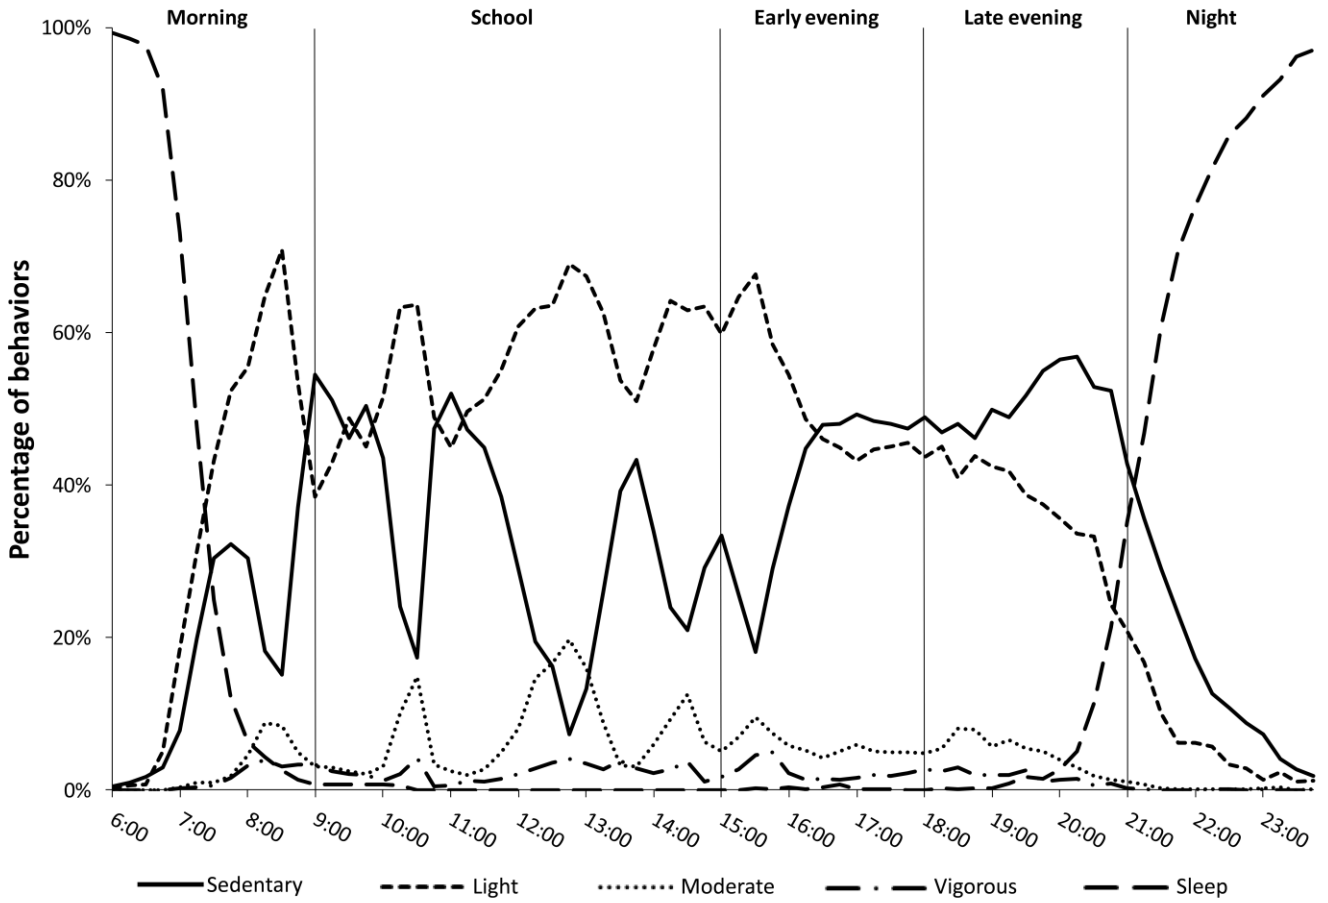**B**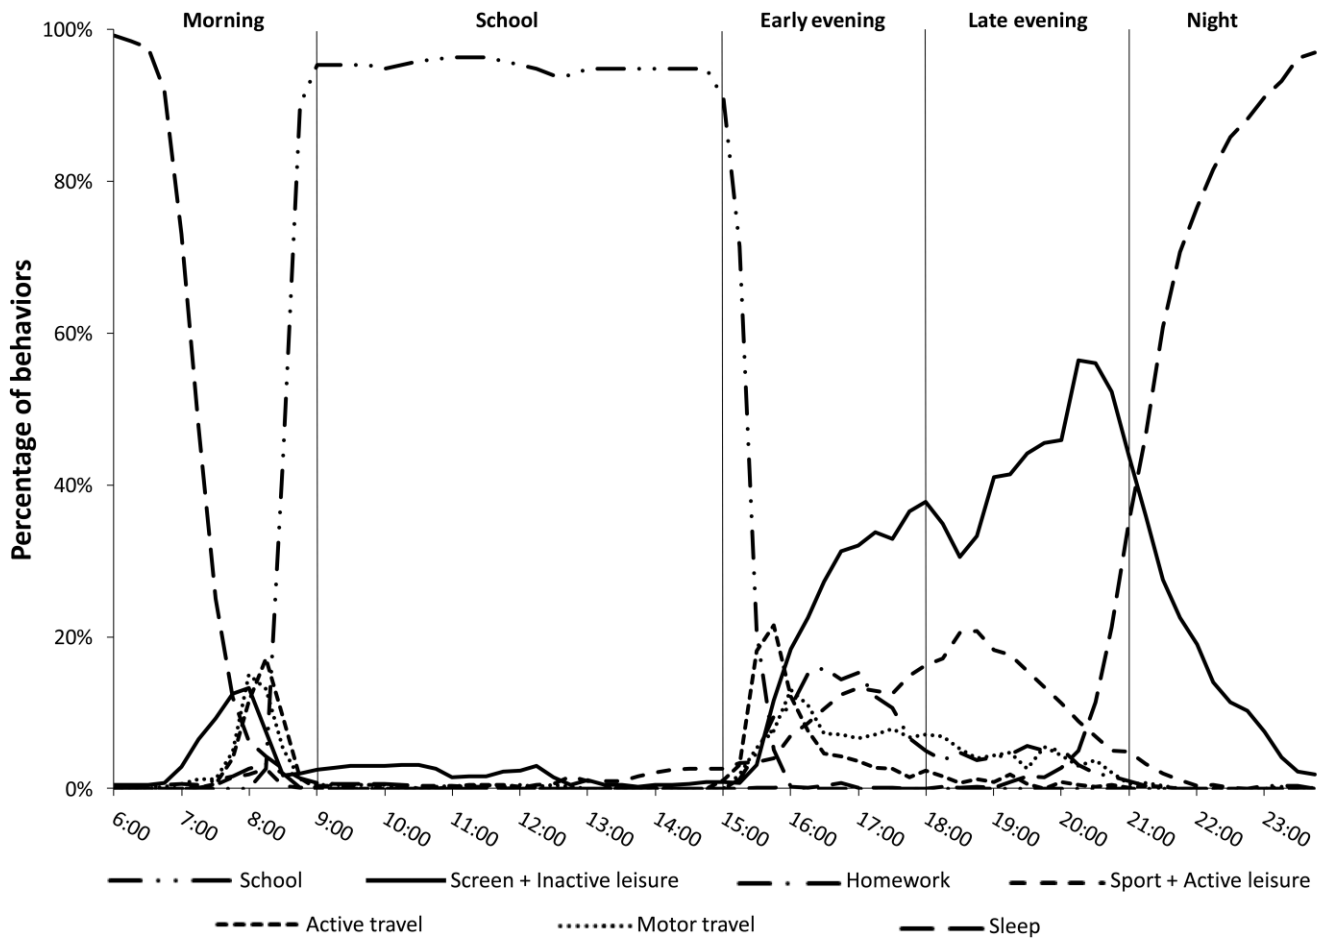

Supplement: 12889_2015_2093_MOESM1_ESM.pdf [file 12889_2015_2093_MOESM1_ESM.pdf]
